# Supplementary material for: A highly potent human antibody neutralizes dengue virus serotype 3 by binding across three surface proteins
Source: PubMed Central journal article supplement (PMC4346626; doi:10.1038/ncomms7341), 2015-02-20
Supplement: ncomms7341-s1.pdf [file ncomms7341-s1.pdf]

1  
2  
3

### Supplementary Figures

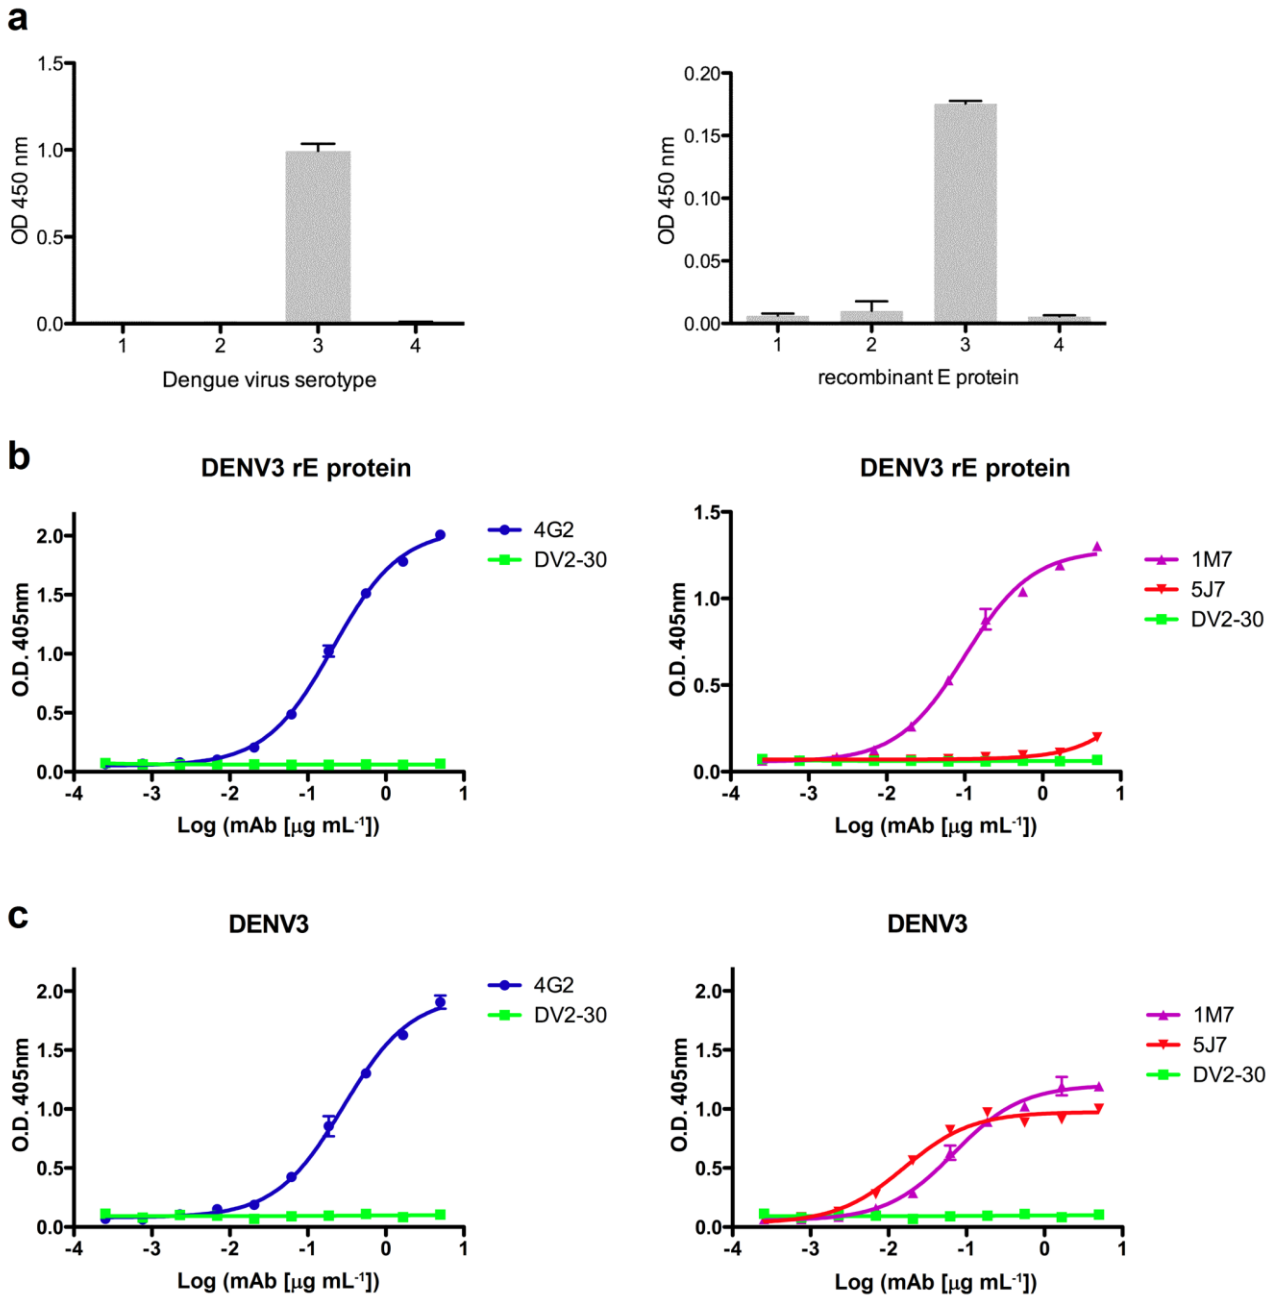

4

5 **Supplementary Figure 1. HMAb 5J7 binds specifically to DENV3 serotype and has higher**  
6 **affinity to whole virus than rE protein.** (a) HMAb 5J7 showed specific binding to DENV3  
7 particles (left) and rE protein (right) coated on ELISA plates. HMAb 5J7 binds to (b) rE protein at  
8 much lower affinity compared to (c) whole virus. Mouse MAb 4G2 (left panels in (b) and (c)),  
9 which bind to an epitope that is not quaternary structure dependent, is used as a control to show the

1 amount of rE and virus coated on the ELISA plates are similar. HMAb 1M7 (right panel in (b) and  
2 (c)), binds to rE and whole virus equally well. In comparison, HMAb 5J7 binds to whole virus with  
3 much higher affinity than rE protein suggesting that the preservation of quaternary structure of the  
4 virus is important for antibody binding. DV2-30 binds to DENV2 specificity and is used as a  
5 negative control. Values are mean  $\pm$  standard deviation. Experiments were repeated at least twice.  
6

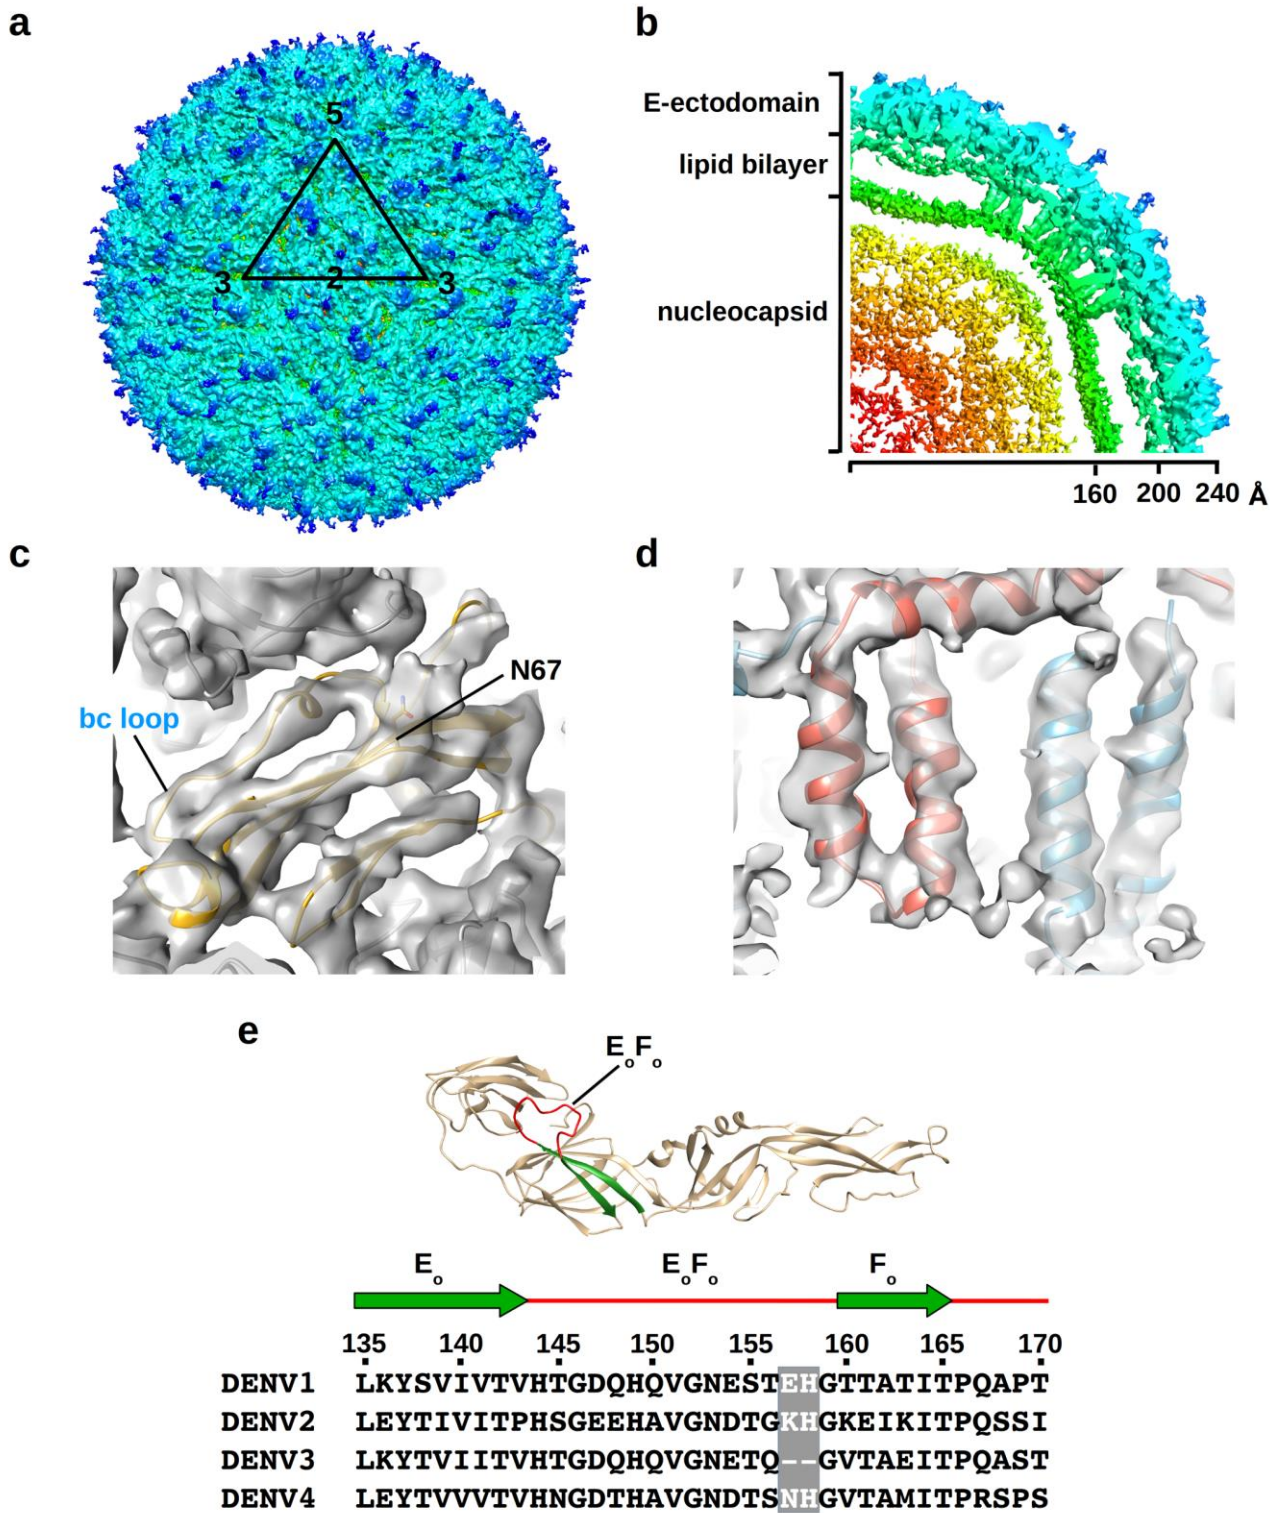

1

2 **Supplementary Figure 2. The cryo-EM structure of mature DENV3 incubated at 28°C.**

3 (a) The 6Å resolution cryo-EM map of mature DENV3. The E protein layer is colored in cyan and  
 4 the glycosylation sites are colored in blue. Black triangle indicates an icosahedral asymmetric unit  
 5 and the numbers represents icosahedral vertices. (b) Cross-section of a quarter of the cryo-EM map.  
 6 Zoomed-in view of fitted (c) E ectodomain, and the (d) trans-membrane  $\alpha$ -helices in the cryo-EM

1 densities (gray). DI, DII and DIII of the E ectodomain, membrane helices of the E protein and M-  
2 protein are colored in red, yellow, blue, light blue and salmon, respectively. Black arrow in panel  
3 (c) points to the density corresponding to glycosylation site at N67. (e) DENV3 has two amino  
4 acids deletion on the E<sub>0</sub>F<sub>0</sub> loop when compared to other serotypes. The position of amino acids  
5 deletion in the sequence is shown in grey box.

6

7

8

9

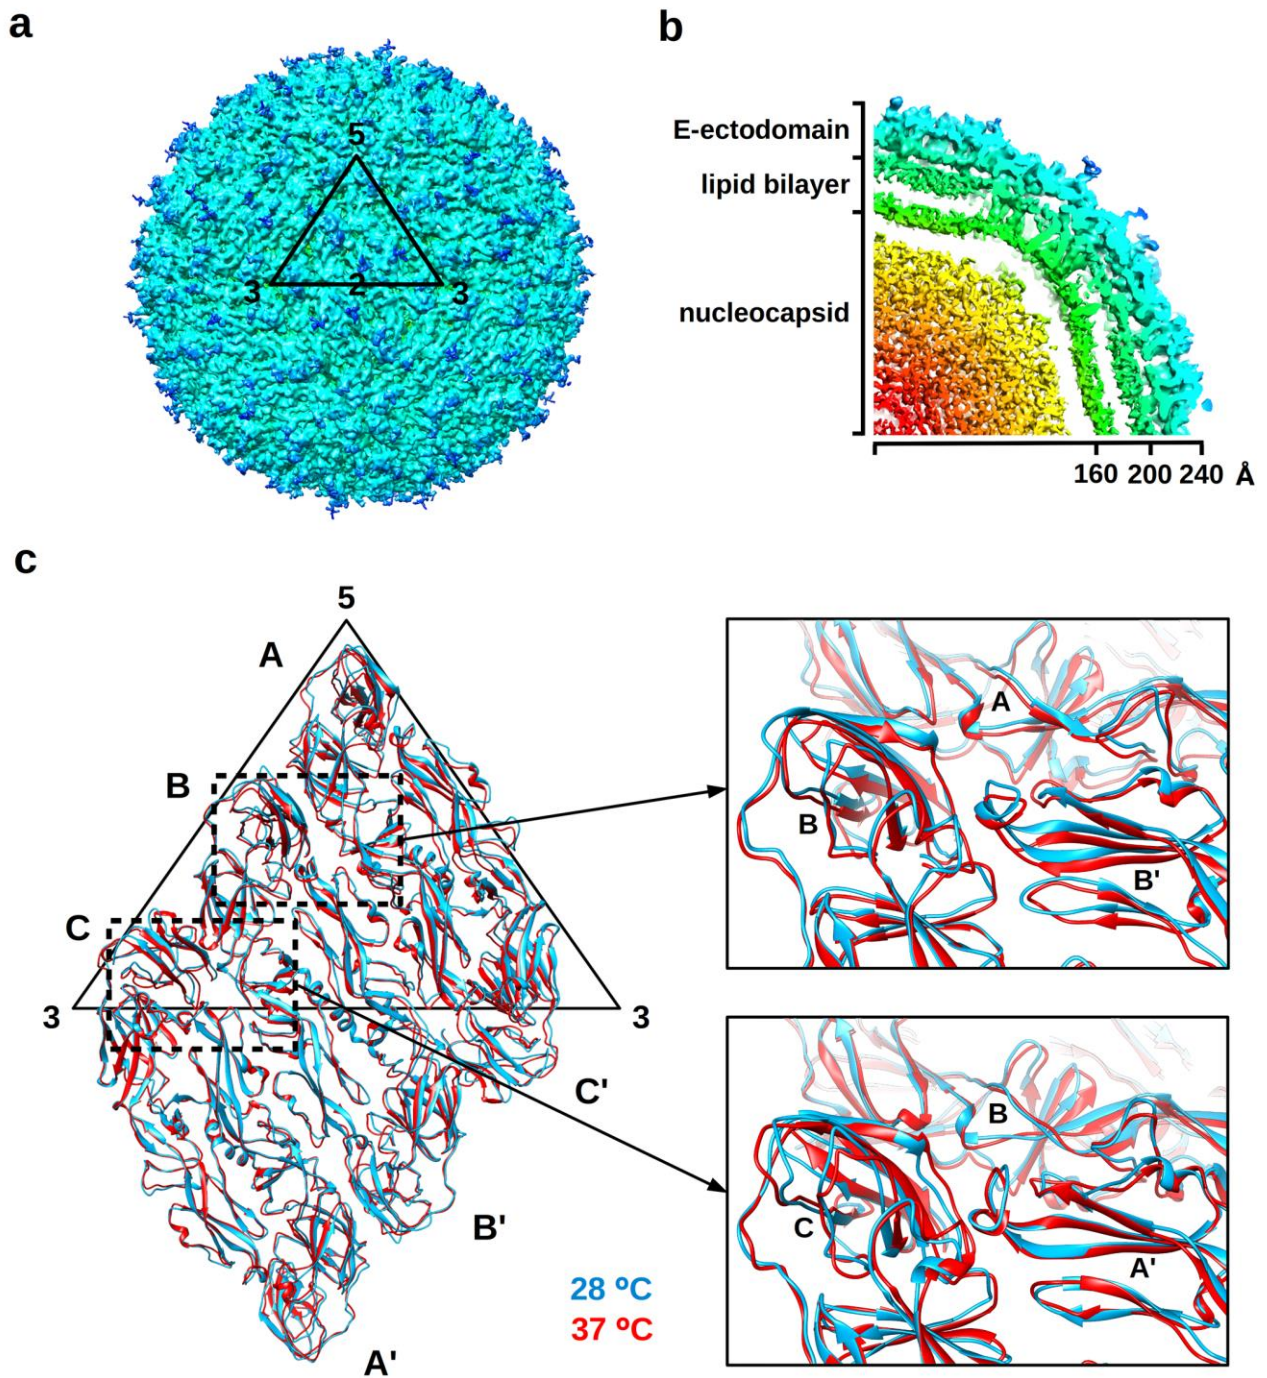

1

2 **Supplementary Figure 3 The cryo-EM structure of mature DENV3 at 37°C.**

3 (a) The 7Å resolution cryo-EM map. The E protein layer is colored in cyan and the glycosylation  
 4 sites are colored in blue. Black triangle indicates an icosahedral asymmetric unit and the numbers  
 5 represents icosahedral vertices. (b) Cross-section of a quarter of the cryo-EM map. (c)  
 6 Superposition of cryo-EM structures of the mature DENV3 structures at 28°C (blue) and 37°C  
 7 (red).



1

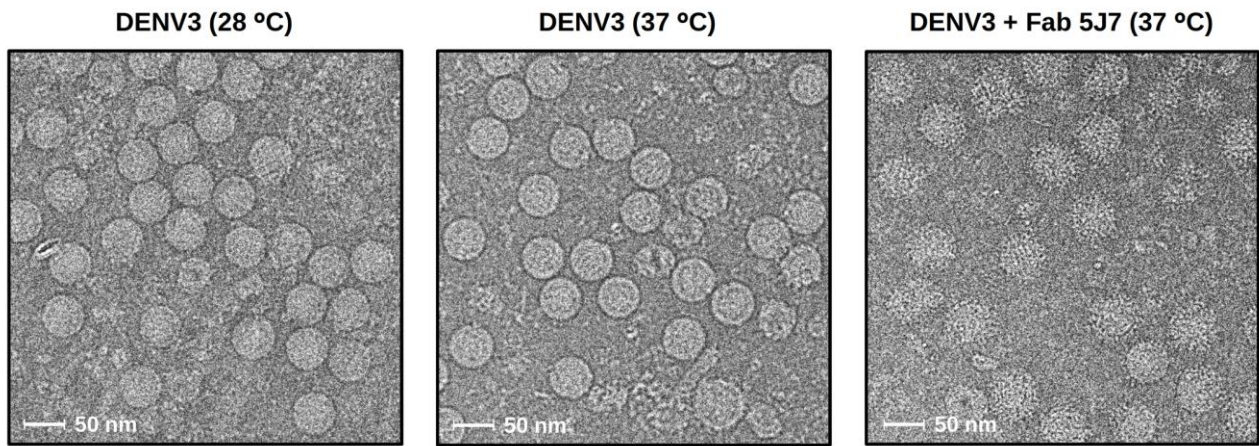

2

3 **Supplementary Figure 4 Micrographs showing DENV3 controls at 28°C (left), 37°C (middle)**  
4 **and DENV3 complexed with Fab 5J7 at 37°C (right).**

5

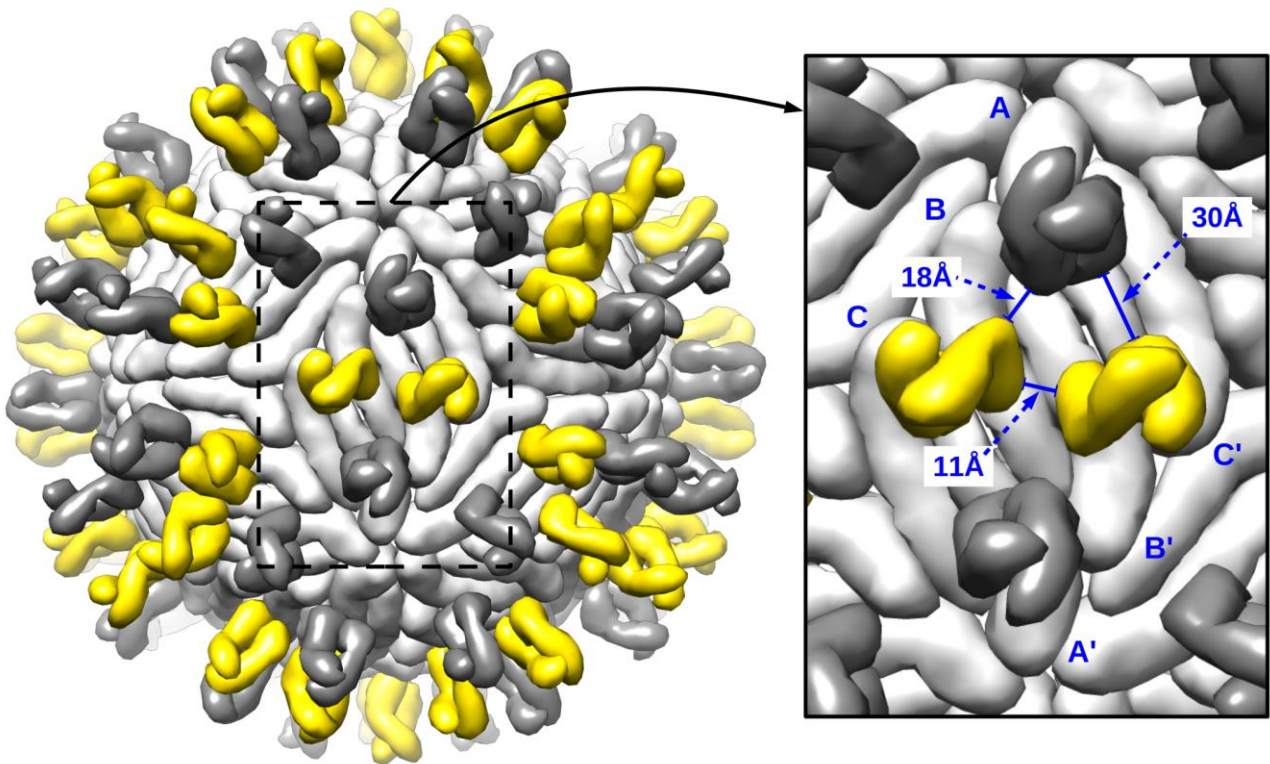

6

7 **Supplementary Figure 5 Fabs bound to epitope on mols A, B and B' will not interfere with the**  
8 **binding of Fabs to epitope to the second site (mols B, C, and A').** Superposition of the Fab (dark  
9 grey) bound to E protein epitope on mols A-B-B' onto molecules B-C-A' showed that the Fab  
10 molecule on mols A-B-B' will not sterically prevent the Fab (yellow) from binding to molecules B-

1 C-A'. The closest distance between Fab molecules are shown as bars and the distances are  
 2 indicated. E-proteins are colored in light grey and the three individual E proteins in an asymmetric  
 3 unit are indicated.

4

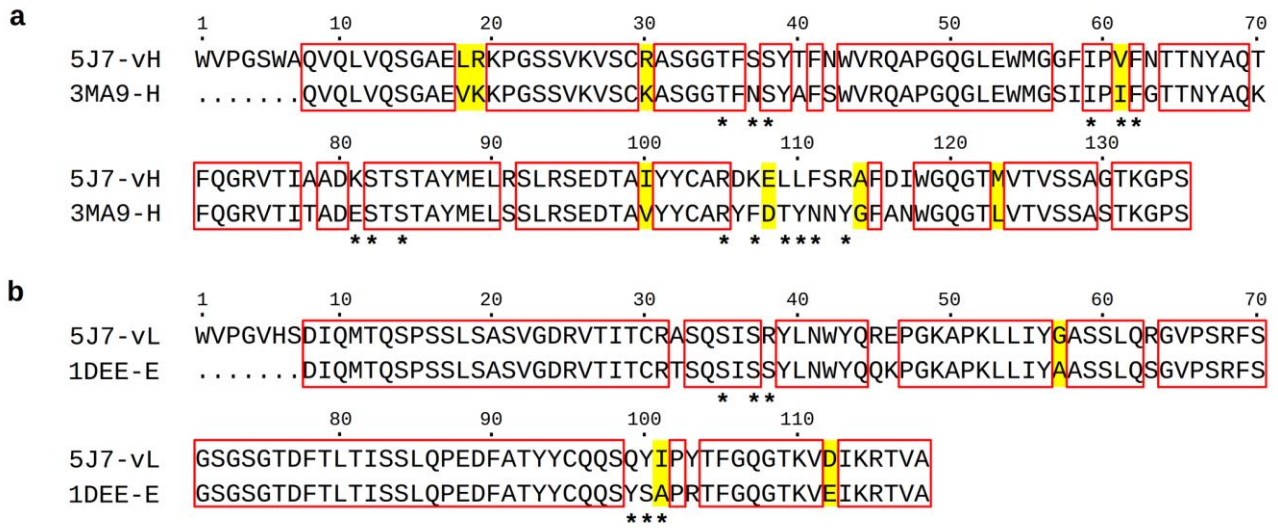

5

6 **Supplementary Figure 6 Sequence alignment between the variable region of Fab 5J7 (heavy**  
 7 **and light chains) and its corresponding starting homology models. (a) Sequence alignment**  
 8 **between variable region of Fab 5J7 heavy chain and model 3MA9 chain H. (b) Sequence alignment**  
 9 **between variable region of Fab 5J7 light chain and model 1DEE chain E. Conserved residues are**  
 10 **boxed in red, residues with similar characteristics are boxed in yellow, CRDs are marked by “\*”.**  
 11 **The first 7 N-terminal residues are not present in the starting homology models 3MA9-H and**  
 12 **1DEE-E.**

13

14

15
